# Supplementary material for: Prescription Drug Dispensing to US Children During the COVID-19 Pandemic
Source: Oxford University Press journal article supplement (doi:10.1542/peds.2021-049972), 2021-07-20
Supplement: peds_2021049972supplementarydata.pdf [file peds_2021049972supplementarydata.pdf]

## Supplemental Materials

### Sensitivity Analysis When Modeling the Number of Dispensed Prescriptions per 100 000 US Children

Children aged 0 to 19 years accounted for ~24.86% of the US population in 2019, according to the 2019 US Census Bureau's estimates of population size by single year of age.<sup>31</sup>

We obtained monthly US Census Bureau estimates of the US resident population and multiplied by 24.86% to obtain the estimated monthly number of children in 2019 and 2020.<sup>12</sup> For each month in 2019 and 2020, we calculated the number of dispensed prescriptions per 100 000 US children.

During April to December 2019, the mean number of dispensed prescriptions per 100 000 children per month was 29 978.5, compared to 21 748.4 for April to December 2020 (unadjusted percentage change between these periods: -27.5%) (Supplemental Table 4). In the main analysis, which assessed the number of dispensed prescriptions, the unadjusted percentage change was -27.1%, a minimal difference.

### Additional Details on Prescription Dispensing to Children in 2019

For interested readers, we provide additional details on prescription dispensing to children in 2019 according to branded or generic status, controlled substance status, and prescriber specialty in Supplemental Table 5. An authorized generic is a generic that is therapeutically equivalent to a branded drug. We identified controlled substances using the US Drug Enforcement Administration's list of these substances and a substrung search of molecule names.<sup>32</sup>

We also provide estimates of the rate of prescription drug dispensing per US child in 2019. According to the US Census Bureau's estimates of population size by single year of age, there were 81 625 416 US children aged 0 to 19 years in 2019.<sup>31</sup> Our sample included 299 188 743 dispensed prescriptions to children aged 0 to 19 years in 2019, yielding a per-capita dispensing rate of 3.7 dispensed prescriptions per child.

By age group, it was estimated via US Census Bureau data that there

were 11 534 695, 28 237 883, and 41 852 838 children aged 0 to 2 years, 3 to 9 years, and 10 to 19 years, respectively. In the NPA, there were 32 989 896, 86 362 416, and 179 836 431 dispensed prescriptions in each age group. This yields a per-capita dispensing rate of 2.9, 3.1, and 4.3 dispensed prescriptions per US child, respectively.

### Supplemental References

31. US Census Bureau. Annual estimates of the resident population by single year of age and sex for the United States: April 1, 2010 to July 1, 2019 (NC-EST2019-SYASEXN). 2020. Available at: <https://www2.census.gov/programs-surveys/popest/tables/2010-2019/national/asrh/nc-est2019-syasexn.xlsx>. Accessed May 1, 2021
32. US Drug Enforcement Administration. Controlled substances. Available at: [https://www.deadiversion.usdoj.gov/schedules/orangebook/e\\_cs\\_sched.pdf](https://www.deadiversion.usdoj.gov/schedules/orangebook/e_cs_sched.pdf). Accessed May 1, 2021

**SUPPLEMENTAL TABLE 3** List of Drug Classes Assigned to Each Category

| Drug Class                                            | Most Common Product in 2019 Within Class         | Category  |
|-------------------------------------------------------|--------------------------------------------------|-----------|
| Systemic antibiotics                                  | Amoxicillin                                      | Infection |
| Anti-infectives, eye                                  | Polymyxin B-trimethoprim                         | Infection |
| Antivirals, influenza                                 | Oseltamivir                                      | Infection |
| Antitussives                                          | Brompheniramine-dextromethorphan-pseudoephedrine | Infection |
| Antifungals dermatologic                              | Nystatin                                         | Infection |
| Antibacterials, topical                               | Mupirocin                                        | Infection |
| Steroid or anti-infectives, ear                       | Ciprofloxacin-dexamethasone                      | Infection |
| Systemic antifungals                                  | Fluconazole                                      | Infection |
| Ectoparas, including scabicide                        | Permethrin                                       | Infection |
| Anti-infectives, ear                                  | Ofloxacin                                        | Infection |
| Antivirals, herpes                                    | Acyclovir                                        | Infection |
| Mouth antifungals                                     | Nystatin                                         | Infection |
| Urinary anti-infectives and antiseptics               | Nitrofurantoin                                   | Infection |
| Trichomonacides                                       | Metronidazole                                    | Infection |
| Ophthalmic antiinflammatory and anti-infective        | Dexamethasone-neomycin-polymyxin b               | Infection |
| Antimalarials                                         | Atovaquone-proguanil                             | Infection |
| Viral infection, topical                              | Imiquimod                                        | Infection |
| Chest rubs and inhalants                              | Sodium                                           | Infection |
| Anthelmintics                                         | Albendazole                                      | Infection |
| Gynecologic antifungals                               | Terconazole                                      | Infection |
| Intestinal anti-infective antidiarrheals              | Vancomycin                                       | Infection |
| Corticosteroids, ear                                  | Fluocinolone acetonide                           | Infection |
| Other ear preparations                                | Acetic acid                                      | Infection |
| Gynecologic antibacterials                            | Clindamycin                                      | Infection |
| Other antiparasitics                                  | Atovaquone                                       | Infection |
| Antivirals, eye                                       | Ganciclovir                                      | Infection |
| Amebicides                                            | Nitazoxanide                                     | Infection |
| Schistosomicides                                      | Praziquantel                                     | Infection |
| Specific immunoglobulins antibacterial                | Antitetanus immunoglobulin                       | Infection |
| ADHD                                                  | Methylphenidate                                  | Chronic   |
| Antidepressants                                       | Sertraline                                       | Chronic   |
| Antiasthmatics                                        | Montelukast                                      | Chronic   |
| Inhaled short-acting $\beta$ -agonists                | Albuterol                                        | Chronic   |
| Oral corticosteroids                                  | Prednisolone                                     | Chronic   |
| Antiepileptics                                        | Lamotrigine                                      | Chronic   |
| Antipsychotics                                        | Aripiprazole                                     | Chronic   |
| Antiulcerants                                         | Ranitidine                                       | Chronic   |
| Human insulins and analogues                          | Insulin lispro                                   | Chronic   |
| Thyroid preps                                         | Levothyroxine                                    | Chronic   |
| $\beta$ -blockers, plain and combination              | Propranolol                                      | Chronic   |
| Diuretics                                             | Spironolactone                                   | Chronic   |
| Traditional type II antidiabetics                     | Metformin                                        | Chronic   |
| Antidiuretic hormones                                 | Desmopressin                                     | Chronic   |
| Ace inhibitors, plain and combination                 | Lisinopril                                       | Chronic   |
| Sex hormones (androgens, estrogens, progestogens)     | Testosterone                                     | Chronic   |
| Immunosuppressants                                    | Tacrolimus                                       | Chronic   |
| Growth hormones                                       | Somatropin                                       | Chronic   |
| Devices asthmatic                                     | Nonpharmaceutical ingredient                     | Chronic   |
| Mood stabilizers                                      | Lithium                                          | Chronic   |
| Urinary incontinence                                  | Oxybutynin                                       | Chronic   |
| Immunology biologics                                  | Adalimumab                                       | Chronic   |
| Anti-Parkinson                                        | Benzotropine                                     | Chronic   |
| Antihypertensives (of nonherbal origin) plain         | Prazosin                                         | Chronic   |
| Oncologics (cytotoxics)                               | Methotrexate                                     | Chronic   |
| All other diagnostic tests, equipment and accessories | Nonpharmaceutical ingredient                     | Chronic   |
| Anticholinergics, plain and combination               | Ipratropium                                      | Chronic   |
| Antiglaucoma preps                                    | Latanoprost                                      | Chronic   |
| Calcium antagonists, plain and combination            | Amlodipine                                       | Chronic   |
| $\beta$ 2-stimulants, systemic                        | Albuterol                                        | Chronic   |
| Glucagon                                              | Glucagon                                         | Chronic   |
| Lipid regulators                                      | Atorvastatin                                     | Chronic   |

**SUPPLEMENTAL TABLE 3** Continued

| Drug Class                                               | Most Common Product in 2019 Within Class                          | Category |
|----------------------------------------------------------|-------------------------------------------------------------------|----------|
| Intestinal antiinflammatories                            | Mesalamine                                                        | Chronic  |
| Hypnotics, sedatives and barbiturates (herbals)          | Phenobarbital                                                     | Chronic  |
| Dietetics                                                | Carnitine                                                         | Chronic  |
| Digestives, including enzymes                            | Amylase-lipase-protease                                           | Chronic  |
| Angiotensin II, plain, combination, and renin inhibitors | Losartan                                                          | Chronic  |
| Antithyroid preparations                                 | Methimazole                                                       | Chronic  |
| HIV antivirals                                           | Emtricitabine-tenofovir disoproxil                                | Chronic  |
| Expectorants                                             | Dornase alfa                                                      | Chronic  |
| Opioid dependence                                        | Naltrexone                                                        | Chronic  |
| Oncologics (hormonals)                                   | Anastrozole                                                       | Chronic  |
| Vitamin K antagonists                                    | Warfarin                                                          | Chronic  |
| Mydriatics and cycloplegics                              | Atropine                                                          | Chronic  |
| Oncologics (targeted)                                    | Hydroxyurea                                                       | Chronic  |
| Platelet aggregation inhibitors                          | Acetylsalicylic acid                                              | Chronic  |
| Antirheumatics and analgesics, topical                   | Diclofenac                                                        | Chronic  |
| Antituberculars                                          | Isoniazid                                                         | Chronic  |
| Benign prostatic hypertrophy                             | Tamsulosin                                                        | Chronic  |
| All other asthma and COPD, inhaled and systemic          | Omalizumab                                                        | Chronic  |
| Pulmonary arterial hypertension                          | Sildenafil                                                        | Chronic  |
| All other CNS                                            | Docosahexaenoic acid-eicosapentaenoic acid-phytosterols-vitamin E | Chronic  |
| Miotics and antiglaucoma, systemic                       | Acetazolamide                                                     | Chronic  |
| Bile therapy and chologogues                             | Ursodiol                                                          | Chronic  |
| Antiobesity preparations, excluding dietetics            | Phentermine                                                       | Chronic  |
| All other respiratory                                    | Sodium                                                            | Chronic  |
| Cardiac glycosides and combinations                      | Digoxin                                                           | Chronic  |
| Antigout preparations                                    | Colchicine                                                        | Chronic  |
| Blood coagulation                                        | Factor VIII                                                       | Chronic  |
| Newer generation type II antidiabetics                   | Liraglutide                                                       | Chronic  |
| Insulin devices                                          | Disposable medical devices                                        | Chronic  |
| Direct factor Xa inhibitors                              | Rivaroxaban                                                       | Chronic  |
| Antifibrinolytics                                        | Tranexamic acid                                                   | Chronic  |
| Autoimmune others                                        | Leflunomide                                                       | Chronic  |
| Antiarrhythmics                                          | Flecainide                                                        | Chronic  |
| Erythropoietins                                          | Erythropoietin alpha                                              | Chronic  |
| Hypothalamic hormones                                    | Leuprolide                                                        | Chronic  |
| Other anti-Alzheimer                                     | Memantine                                                         | Chronic  |
| Hyperkalemia or hyperphosphatemia                        | Sevelamer                                                         | Chronic  |
| Other hematologics                                       | Hydroxyurea                                                       | Chronic  |
| Iron-chelating                                           | Deferasirox                                                       | Chronic  |
| Prolactin inhibitors                                     | Cabergoline                                                       | Chronic  |
| Antagonists (antidotes to anticoagulants)                | Phytonadione                                                      | Chronic  |
| Immunostim Ag Ex interferon, glatiramer acetate          | Pegfilgrastim                                                     | Chronic  |
| All other cardiac preparations                           | Carnitine                                                         | Chronic  |
| Muscle relaxant, peripheral                              | Botulinum A toxin                                                 | Chronic  |
| Polyvalent immunoglobulin IM                             | Immune globulin                                                   | Chronic  |
| Nitrites and nitrates                                    | Nitroglycerin                                                     | Chronic  |
| Thrombopoietin agonists                                  | Eltrombopag                                                       | Chronic  |
| Other alimentary tract and metabolism products           | Sapropterin                                                       | Chronic  |
| Osteoporosis                                             | Alendronate                                                       | Chronic  |
| Autoimmune targeted small molecules                      | Tofacitinib                                                       | Chronic  |
| Multiple sclerosis                                       | Fingolimod                                                        | Chronic  |
| Treatment of leprosy                                     | Dapsone                                                           | Chronic  |
| Cerebral and peripheral vasotherapeutics                 | Pentoxifylline                                                    | Chronic  |
| Polyvalent immunoglobulin IV                             | Immune globulin                                                   | Chronic  |
| Coronary therapy, excluding calcium antagonists          | Ivabradine                                                        | Chronic  |
| Erectile dysfunction                                     | Sildenafil                                                        | Chronic  |
| Gonadotrophins                                           | Clomiphene                                                        | Chronic  |
| Anabolic hormones, systemic                              | Oxandrolone                                                       | Chronic  |
| Other ophthalmologics                                    | Cysteamine                                                        | Chronic  |
| NK1 antagonist antiemetic and antinauseant               | Aprepitant                                                        | Chronic  |

**SUPPLEMENTAL TABLE 3** Continued

| Drug Class                                            | Most Common Product in 2019 Within Class                          | Category |
|-------------------------------------------------------|-------------------------------------------------------------------|----------|
| Alcohol dependence                                    | Naltrexone                                                        | Chronic  |
| Hepatitis B                                           | Entecavir                                                         | Chronic  |
| Psycholeptic-psychoanaesthetic                        | Fluoxetine-olanzapine                                             | Chronic  |
| Hereditary angioedema                                 | Lanadelumab                                                       | Chronic  |
| Adrenocorticotrophic hormone                          | Corticotrophin                                                    | Chronic  |
| Interferons, excluding multiple sclerosis market      | Interferon-γ                                                      | Chronic  |
| Respiratory stimulants                                | Caffeine                                                          | Chronic  |
| Hepatitis C                                           | Ledipasvir-sofosbuvir                                             | Chronic  |
| Other antithrombotics                                 | Fondaparinux                                                      | Chronic  |
| Direct thrombin inhibitors                            | Dabigatran etexilate                                              | Chronic  |
| Other specific immunoglobulins                        | Immunoglobulin                                                    | Chronic  |
| Calcitonins                                           | Calcitonin (salmon)                                               | Chronic  |
| Detox against antineoplastic treatment                | Mesna                                                             | Chronic  |
| PCSK9 inhibitors                                      | Evolocumab                                                        | Chronic  |
| Hepatitis B or C                                      | Ribavirin                                                         | Chronic  |
| Neurotonics and other preparations                    | Acetylcysteine-folic acid-mecobalamin                             | Chronic  |
| Bisphosphonates tumor-related and bony metastases     | Zoledronic acid                                                   | Chronic  |
| Nootropics                                            | Docosahexaenoic acid-eicosapentaenoic acid-phytosterols-vitamin E | Chronic  |
| Specific immunoglobulin antiviral                     | Varicella zoster immunoglobulin                                   | Chronic  |
| Positive inotropics                                   | Milrinone                                                         | Chronic  |
| All other antidiarrheals                              | Crofelemer                                                        | Chronic  |
| Choleretics and cholekinetics                         | Cholic acid                                                       | Chronic  |
| Antihypertensives (of nonherbal origin), combination  | Hydrochlorothiazide-methyldopa                                    | Chronic  |
| Contraception, systemic hormonal                      | Ethinylestradiol-norgestimate                                     | Other    |
| Topical steroids                                      | Triamcinolone acetonide                                           | Other    |
| Antiacne                                              | Clindamycin                                                       | Other    |
| Antihistamines systemic                               | Cetirizine                                                        | Other    |
| Nasal corticosteroids without anti-infectives         | Fluticasone                                                       | Other    |
| Serotonin antagonist antiemetics and antinauseants    | Ondansetron                                                       | Other    |
| Antirheumatics, nonsteroidal                          | Ibuprofen                                                         | Other    |
| Tranquillizers                                        | Hydroxyzine                                                       | Other    |
| Nonnarcotic analgesics                                | Ibuprofen                                                         | Other    |
| Narcotic analgesics                                   | Acetaminophen-hydrocodone                                         | Other    |
| Vitamins and minerals                                 | Ergocalciferol                                                    | Other    |
| Stomatologicals                                       | Sodium                                                            | Other    |
| Cardiac stimulants excluding cardiac glycosides       | Epinephrine                                                       | Other    |
| Nontherapeutics                                       | OptiChamber Diamond                                               | Other    |
| Functional GI disorders                               | Dicyclomine                                                       | Other    |
| Ocular antiallergic                                   | Olopatadine                                                       | Other    |
| Muscle relaxants, central                             | Cyclobenzaprine                                                   | Other    |
| Antimigraine triptans                                 | Sumatriptan                                                       | Other    |
| Laxatives                                             | Lactulose                                                         | Other    |
| Other nonsteroidal antiinflammatory, skin             | Crisaborole                                                       | Other    |
| Nasal preparations, systemic and nasal antiallergics  | Azelastine                                                        | Other    |
| Other antianemics, including folic acid, folinic acid | Folic acid                                                        | Other    |
| Anesthetics, local                                    | Lidocaine                                                         | Other    |
| Emollients and protectives                            | Ammonium                                                          | Other    |
| All other urologic                                    | Phenazopyridine                                                   | Other    |
| Corticosteroids, eye                                  | Prednisolone                                                      | Other    |
| Other antiemetics and antinauseants                   | Meclizine                                                         | Other    |
| Antivirals, respiratory, excluding influenza          | Palivizumab                                                       | Other    |
| Antipsoriasis, topical                                | Tazarotene                                                        | Other    |
| Nonbarbiturate, plain and combination                 | Triazolam                                                         | Other    |
| All other therapeutics                                | Lactulose                                                         | Other    |
| Appetite stimulants                                   | Cyproheptadine                                                    | Other    |
| Nasal preparations, topical                           | Ipratropium                                                       | Other    |
| Motility inhibitors                                   | Loperamide                                                        | Other    |
| Other dermatologics                                   | Finasteride                                                       | Other    |
| Ophthalmologics, nonsteroidal antiinflammatory        | Ketorolac                                                         | Other    |
| Sex hormones, topical                                 | Estrogenic sub, conjugated                                        | Other    |

**SUPPLEMENTAL TABLE 3** Continued

| Drug Class                                           | Most Common Product in 2019 Within Class                  | Category |
|------------------------------------------------------|-----------------------------------------------------------|----------|
| Antacids, antiflatulents, carminatives               | Citric acid-sodium                                        | Other    |
| Fractionated heparins                                | Enoxaparin                                                | Other    |
| Antihemorrhoidal, topical                            | Hydrocortisone                                            | Other    |
| Antimigraine CGRP                                    | Erenumab                                                  | Other    |
| Hematinics, iron and all combinations                | Docusate-folic acid-iron ferrous-multivitamins & minerals | Other    |
| Anesthetics, general                                 | Midazolam                                                 | Other    |
| Hospital solutions                                   | Sodium chloride viaflex                                   | Other    |
| Antiatheroma, natural origin                         | Docosahexaenoic acid-eicosapentaenoic acid                | Other    |
| Artificial tears and dry eye                         | Cyclosporine                                              | Other    |
| Allergens                                            | Pollen                                                    | Other    |
| Antiseptics and disinfectant                         | Hypochlorous acid-sodium                                  | Other    |
| Irrigating solutions                                 | Sodium                                                    | Other    |
| Antipruritics, topical                               | Emollients                                                | Other    |
| Anti-Alzheimer cholinesterase inhibitors             | Donepezil                                                 | Other    |
| Wound healing                                        | Collagenase                                               | Other    |
| Heparins for flushing and other                      | Heparin                                                   | Other    |
| Antimigraine nontriptans                             | Diclofenac                                                | Other    |
| Antismoking                                          | Varenicline                                               | Other    |
| Unfractionated heparins                              | Heparin                                                   | Other    |
| Local anesthetics, eye                               | Tetracaine                                                | Other    |
| Antidotes                                            | Trientine                                                 | Other    |
| Antipsoriasis, systemic                              | Acitretin                                                 | Other    |
| Labor inducers                                       | Methylergonovine                                          | Other    |
| Oral electrolyte replacers                           | Citric acid-sodium                                        | Other    |
| Iodine preps                                         | Potassium                                                 | Other    |
| Contraceptives, topical                              | IUD, copper wire                                          | Other    |
| Fibrinolytics                                        | Alteplase                                                 | Other    |
| Antidiarrheal microorganisms                         | Folic acid-lactobacillus acidophilus                      | Other    |
| Gastroenterography                                   | Barium                                                    | Other    |
| Other musculoskeletal                                | Hyaluronic acid                                           | Other    |
| Hyaluronidase                                        | Hyaluronidase                                             | Other    |
| Advanced imaging                                     | Iohexol                                                   | Other    |
| Antiseptic nonhuman use                              | Formaldehyde                                              | Other    |
| Ophthalmologics, surgical aids                       | Calcium-magnesium-potassium-sodium                        | Other    |
| Ophthalmologics, diagnostic                          | Fluorescein                                               | Other    |
| Gynecologic antiseptics                              | 8-quinolinol-acetic acid                                  | Other    |
| Eye tonics and eye vitamins                          | Multivitamins and minerals                                | Other    |
| Other gynecologics                                   | Paroxetine                                                | Other    |
| Varicose therapy, topical & systemic                 | Diosmin                                                   | Other    |
| Systemic hemostatics                                 | Proctozone-HC                                             | Other    |
| Electrolyte solution                                 | Electrolytes                                              | Other    |
| Tuberculosis vaccines                                | BCG vaccine                                               | Other    |
| Other imaging                                        | Cosyntropin                                               | Other    |
| Tissue sealing preps                                 | Iron ferric                                               | Other    |
| Antitoxic sera                                       | N/A                                                       | Other    |
| Cholecystography and cholangiography                 | N/A                                                       | Other    |
| Ionic angio-urography                                | N/A                                                       | Other    |
| Lung surfactants                                     | N/A                                                       | Chronic  |
| Other cough and cold preparations                    | N/A                                                       | Acute    |
| Other hormones and preparations with similar actions | N/A                                                       | Other    |

CGRP, calcitonin gene-related peptide pathway; CNS, central nervous system; COPD, chronic obstructive pulmonary disease; GI, gastrointestinal; IM, intramuscular; IUD, intrauterine device; IV, intravenous; N/A, these classes had no prescriptions dispensed to children in 2019; NK1, neurokinin-1.

**SUPPLEMENTAL TABLE 4** Monthly Number of Prescriptions Dispensed per 100 000 Children, 2019–2020

| Month          | No. US Residents | Estimated No. US Children | Total No. Prescriptions Dispensed to Children | Total No. Prescriptions Dispensed per 100 000 US Children |
|----------------|------------------|---------------------------|-----------------------------------------------|-----------------------------------------------------------|
| January 2019   | 327 540 066      | 81 426 460                | 26 231 370                                    | 32 215                                                    |
| February 2019  | 327 635 482      | 81 450 181                | 25 734 579                                    | 31 595                                                    |
| March 2019     | 327 733 545      | 81 474 559                | 26 938 181                                    | 33 063                                                    |
| April 2019     | 327 842 998      | 81 501 769                | 25 549 896                                    | 31 349                                                    |
| May 2019       | 327 964 770      | 81 532 042                | 24 714 193                                    | 30 312                                                    |
| June 2019      | 328 095 474      | 81 564 535                | 20 988 338                                    | 25 732                                                    |
| July 2019      | 328 239 523      | 81 600 345                | 21 724 284                                    | 26 623                                                    |
| August 2019    | 328 409 545      | 81 642 613                | 23 511 721                                    | 28 798                                                    |
| September 2019 | 328 578 004      | 81 684 492                | 23 685 485                                    | 28 996                                                    |
| October 2019   | 328 744 045      | 81 725 770                | 25 796 842                                    | 31 565                                                    |
| November 2019  | 328 891 009      | 81 762 305                | 26 085 977                                    | 31 905                                                    |
| December 2019  | 329 018 969      | 81 794 116                | 28 227 877                                    | 34 511                                                    |
| January 2020   | 329 135 084      | 81 822 982                | 27 445 569                                    | 33 543                                                    |
| February 2020  | 329 237 661      | 81 848 483                | 26 505 701                                    | 32 384                                                    |
| March 2020     | 329 342 883      | 81 874 641                | 25 684 219                                    | 31 370                                                    |
| April 2020     | 329 459 499      | 81 903 631                | 16 742 568                                    | 20 442                                                    |
| May 2020       | 329 588 430      | 81 935 684                | 16 212 229                                    | 19 787                                                    |
| June 2020      | 329 726 295      | 81 969 957                | 17 500 601                                    | 21 350                                                    |
| July 2020      | 329 877 505      | 82 007 548                | 18 563 541                                    | 22 636                                                    |
| August 2020    | 330 047 526      | 82 049 815                | 18 691 981                                    | 22 781                                                    |
| September 2020 | 330 215 986      | 82 091 694                | 18 964 301                                    | 23 101                                                    |
| October 2020   | 330 382 026      | 82 132 972                | 19 657 289                                    | 23 933                                                    |
| November 2020  | 330 528 990      | 82 169 507                | 18 448 982                                    | 22 452                                                    |
| December 2020  | 330 656 950      | 82 201 318                | 15 821 914                                    | 19 248                                                    |

**SUPPLEMENTAL TABLE 5** Prescription Dispensing to US Children in 2019 by Branded/Generic Status, Controlled Substance Status, and Prescriber Specialty

| Category                 | No. Prescriptions Dispensed to Children in 2019 (% of All Prescriptions) |
|--------------------------|--------------------------------------------------------------------------|
| All drugs                | 299 188 743 (100.0)                                                      |
| Branded or generic       |                                                                          |
| Branded                  | 21 712 266 (7.3)                                                         |
| Generic                  | 251 786 047 (84.2)                                                       |
| Authorized generic       | 25 690 430 (8.6)                                                         |
| Controlled substance     |                                                                          |
| Controlled substance     | 31 816 756 (10.6)                                                        |
| Not controlled substance | 267 371 987 (89.4)                                                       |
| Specialty                |                                                                          |
| Pediatrics               | 86 336 841 (28.9)                                                        |
| Nurse practitioner       | 62 302 892 (20.8)                                                        |
| Physician assistant      | 25 821 055 (8.6)                                                         |
| Psychiatry               | 22 993 011 (7.7)                                                         |
| Family practice          | 18 253 705 (6.1)                                                         |
| All other specialties    | 83 481 239 (27.9)                                                        |

**SUPPLEMENTAL TABLE 6** Raw Numbers for Unadjusted Year-Over-Year Percentage Changes in Dispensing Overall and by Age Group, Dispensing Channel, and Payer Type

|                             | No. Prescriptions<br>Dispensed (April to<br>August 2019) | No. Prescriptions<br>Dispensed (April to<br>August 2020) | No. Prescriptions<br>Dispensed<br>(September to<br>December 2019) | No. Prescriptions<br>Dispensed<br>(September to<br>December 2020) | No. Prescriptions<br>Dispensed (April to<br>December 2019) | No. Prescriptions<br>Dispensed (April<br>to December<br>2020) |
|-----------------------------|----------------------------------------------------------|----------------------------------------------------------|-------------------------------------------------------------------|-------------------------------------------------------------------|------------------------------------------------------------|---------------------------------------------------------------|
| All drugs                   | 116 488 432                                              | 87 710 920                                               | 103 796 181                                                       | 72 892 486                                                        | 220 284 613                                                | 160 603 406                                                   |
| Age group, y                |                                                          |                                                          |                                                                   |                                                                   |                                                            |                                                               |
| 0–2                         | 12 046 706                                               | 6 519 949                                                | 12 308 523                                                        | 5 979 784                                                         | 24 355 229                                                 | 12 499 733                                                    |
| 3–9                         | 31 777 663                                               | 20 374 032                                               | 30 501 107                                                        | 16 590 070                                                        | 62 278 770                                                 | 36 964 102                                                    |
| 10–19                       | 72 664 063                                               | 60 816 939                                               | 60 986 551                                                        | 50 322 632                                                        | 133 650 614                                                | 111 139 571                                                   |
| Channel                     |                                                          |                                                          |                                                                   |                                                                   |                                                            |                                                               |
| Retail<br>pharmacy          | 112 012 627                                              | 83 632 684                                               | 100 106 805                                                       | 69 603 153                                                        | 212 119 432                                                | 153 235 837                                                   |
| Mail-order<br>pharmacy      | 1 545 608                                                | 1 584 713                                                | 1 315 111                                                         | 1 273 211                                                         | 2 860 719                                                  | 2 857 924                                                     |
| Long-term care<br>pharmacy  | 2 930 197                                                | 2 493 523                                                | 2 374 265                                                         | 2 016 122                                                         | 5 304 462                                                  | 4 509 645                                                     |
| Payer type                  |                                                          |                                                          |                                                                   |                                                                   |                                                            |                                                               |
| Cash                        | 4 565 629                                                | 3 117 809                                                | 3 966 171                                                         | 2 643 642                                                         | 8 531 800                                                  | 5 761 451                                                     |
| Medicaid fee<br>for service | 14 690 981                                               | 11 609 036                                               | 12 631 602                                                        | 9 447 329                                                         | 27 322 583                                                 | 21 056 365                                                    |
| Medicare                    | 241 938                                                  | 222 253                                                  | 228 519                                                           | 198 428                                                           | 470 457                                                    | 420 681                                                       |
| Third party                 | 96 947 060                                               | 72 727 834                                               | 86 935 547                                                        | 60 580 429                                                        | 183 882 607                                                | 133 308 263                                                   |

Unadjusted year-over-year percentage changes in dispensing in Table 1.

**SUPPLEMENTAL TABLE 7** Raw Numbers for Unadjusted Year-Over-Year Percentage Changes in Dispensing Among the Top 30 Drug Classes in 2019

| Category                                          | No. Prescriptions Dispensed (April to August 2019) | No. Prescriptions Dispensed (April to August 2020) | No. Prescriptions Dispensed (September to December 2019) | No. Prescriptions Dispensed (September to December 2020) | No. Prescriptions Dispensed (April to December 2019) | No. Prescriptions Dispensed (April to December 2020) |
|---------------------------------------------------|----------------------------------------------------|----------------------------------------------------|----------------------------------------------------------|----------------------------------------------------------|------------------------------------------------------|------------------------------------------------------|
| Infection-related drug classes                    | 30 392 145                                         | 15 902 449                                         | 30 154 799                                               | 13 580 598                                               | 60 546 944                                           | 29 483 047                                           |
| Antibiotics, systemic                             | 19 366 580                                         | 8 977 143                                          | 19 684 455                                               | 8 378 263                                                | 39 051 035                                           | 17 355 406                                           |
| Anti-infectives, eye                              | 2 103 683                                          | 796 913                                            | 1 655 348                                                | 582 234                                                  | 3 759 031                                            | 1 379 147                                            |
| Antivirals, influenza                             | 389 205                                            | 19 289                                             | 1 579 667                                                | 40 053                                                   | 1 968 872                                            | 59 342                                               |
| Antitussives                                      | 1 108 736                                          | 228 649                                            | 1 865 487                                                | 438 212                                                  | 2 974 223                                            | 666 861                                              |
| Antifungals, topical                              | 1 829 095                                          | 1 465 486                                          | 1 455 302                                                | 1 203 859                                                | 3 284 397                                            | 2 669 345                                            |
| Antibiotics, topical                              | 1 725 558                                          | 1 364 331                                          | 1 273 592                                                | 971 545                                                  | 2 999 150                                            | 2 335 876                                            |
| Steroids or anti-infectives, ear                  | 1 023 376                                          | 825 535                                            | 471 755                                                  | 297 114                                                  | 1 495 131                                            | 1 122 649                                            |
| Chronic disease-related drug classes              | 54 514 760                                         | 46 327 965                                         | 47 739 047                                               | 38 149 018                                               | 102 253 807                                          | 84 476 963                                           |
| ADHD                                              | 15 011 241                                         | 13 241 588                                         | 12 950 632                                               | 11 428 989                                               | 27 961 873                                           | 24 670 557                                           |
| Antidepressants                                   | 8 053 695                                          | 8 048 250                                          | 6 732 398                                                | 6 753 151                                                | 14 786 093                                           | 14 801 401                                           |
| Antiasthmatics                                    | 7 139 422                                          | 5 867 599                                          | 5 886 130                                                | 4 101 078                                                | 13 025 552                                           | 9 968 677                                            |
| Inhaled short-acting -agonists                    | 5 818 467                                          | 3 840 008                                          | 6 176 591                                                | 3 335 936                                                | 11 995 058                                           | 7 175 944                                            |
| Oral corticosteroids                              | 3 386 865                                          | 1 510 619                                          | 3 796 166                                                | 1 463 350                                                | 7 183 031                                            | 2 973 969                                            |
| Antiepileptics                                    | 3 545 433                                          | 3 382 450                                          | 2 863 915                                                | 2 662 405                                                | 6 409 348                                            | 6 044 855                                            |
| Antipsychotics                                    | 2 641 939                                          | 2 594 783                                          | 2 141 772                                                | 2 044 256                                                | 4 783 711                                            | 4 639 039                                            |
| Antulcerants                                      | 2 550 953                                          | 1 783 689                                          | 1 885 864                                                | 1 509 605                                                | 4 436 817                                            | 3 293 294                                            |
| Human insulins and analogues                      | 847 372                                            | 812 771                                            | 691 547                                                  | 622 214                                                  | 1 538 919                                            | 1 434 985                                            |
| Thyroid preparations                              | 801 150                                            | 739 683                                            | 639 231                                                  | 570 971                                                  | 1 440 381                                            | 1 310 654                                            |
| Other drug classes                                | 31 581 527                                         | 25 480 506                                         | 25 902 335                                               | 21 162 870                                               | 57 483 862                                           | 46 643 376                                           |
| Contraception, hormonal systemic                  | 5 281 225                                          | 4 934 612                                          | 4 417 321                                                | 4 020 402                                                | 9 698 546                                            | 8 955 014                                            |
| Topical corticosteroids                           | 4 048 213                                          | 3 593 363                                          | 2 834 865                                                | 2 651 881                                                | 6 883 078                                            | 6 245 244                                            |
| Antihistamines, systemic                          | 2 713 329                                          | 2 212 536                                          | 2 323 527                                                | 1 738 853                                                | 5 036 856                                            | 3 951 389                                            |
| Antiacne                                          | 2 811 487                                          | 2 668 419                                          | 2 271 377                                                | 2 424 904                                                | 5 082 864                                            | 5 093 323                                            |
| Nasal corticosteroids without anti-infectives     | 2 725 362                                          | 1 960 763                                          | 2 194 362                                                | 1 547 302                                                | 4 919 724                                            | 3 508 065                                            |
| Serotonin antagonists, antiemetics, antinauseants | 1 784 541                                          | 795 092                                            | 1 864 341                                                | 770 437                                                  | 3 648 882                                            | 1 565 529                                            |
| Antirheumatics, nonsteroidal                      | 1 845 596                                          | 1 220 382                                          | 1 634 722                                                | 1 162 704                                                | 3 480 318                                            | 2 383 086                                            |
| Tranquilizers                                     | 1 614 013                                          | 1 598 445                                          | 1 344 078                                                | 1 349 030                                                | 2 958 091                                            | 2 947 475                                            |
| Nonnarcotic analgesics                            | 1 142 288                                          | 529 429                                            | 1 207 731                                                | 497 445                                                  | 2 350 019                                            | 1 026 874                                            |
| Narcotic analgesics                               | 1 237 666                                          | 903 614                                            | 858 814                                                  | 752 976                                                  | 2 096 480                                            | 1 656 590                                            |
| Vitamins and minerals                             | 1 123 491                                          | 1 011 116                                          | 858 877                                                  | 843 543                                                  | 1 982 368                                            | 1 854 659                                            |
| Stomatologicals                                   | 1 035 265                                          | 870 591                                            | 761 657                                                  | 740 920                                                  | 1 796 922                                            | 1 611 511                                            |
| Cardiac stimulants, excluding cardiac glycosides  | 712 885                                            | 498 230                                            | 456 766                                                  | 420 292                                                  | 1 169 651                                            | 918 522                                              |

Unadjusted year-over-year percentage changes in dispensing in Table 2.
